# Supplementary material for: Models of insurance fraud: Build-up, ex post moral hazard and optimal contracts
Source: MDPI journal article supplement (doi:10.3390/foods11213343), 1998-01-01
Supplement: s1 [file s1]

## Supplementary Material

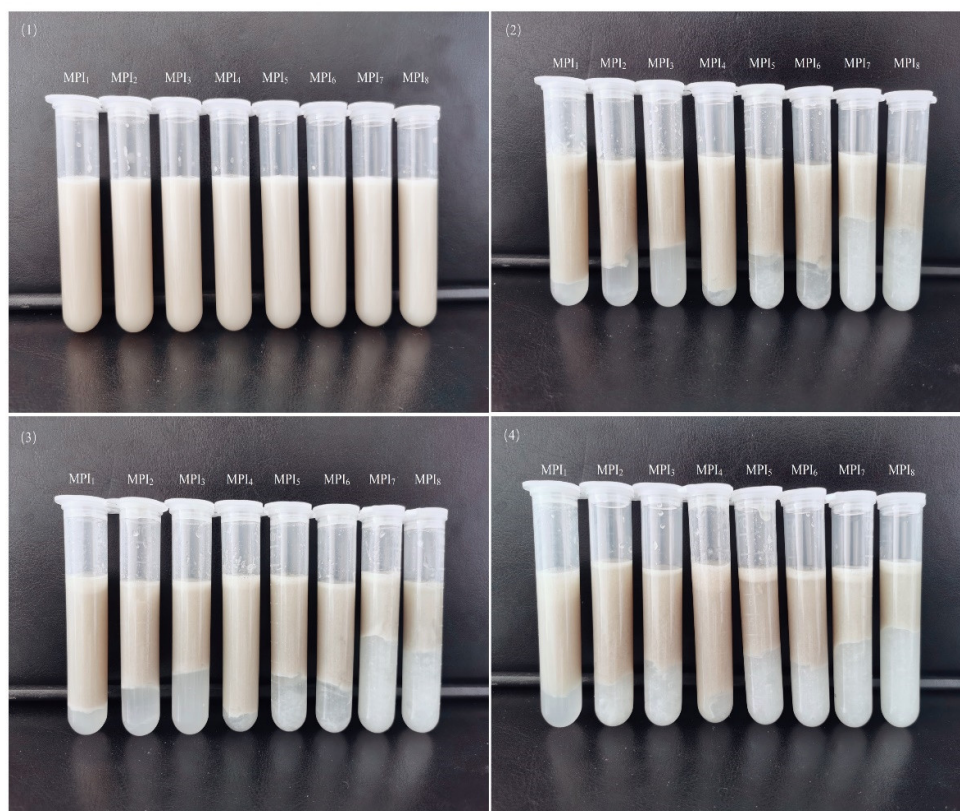

**Figure S1.** Photographs of MPI emulsions before and after 0, 1, 2 and 3 freeze-thaw cycles; 1, 2, 3 and 4 represent 0, 1, 2 and 3 freeze-thaw cycles, respectively.
